# Supplementary material for: Strategy to control magnetic coercivity by elucidating crystallization pathway-dependent microstructural evolution of magnetite mesocrystals
Source: PubMed Central journal article supplement (PMC6962372; doi:10.1038/s41467-019-14168-0), 2020-01-15
Supplement: 41467_2019_14168_MOESM1_ESM.pdf [file 41467_2019_14168_MOESM1_ESM.pdf]

## **Supplementary Information**

**Strategy to control magnetic coercivity by elucidating  
crystallization pathway-dependent microstructural evolution of  
magnetite mesocrystals**

**Park et al.**

## SI 1. Specifications of the samples for comparing crystallization pathways

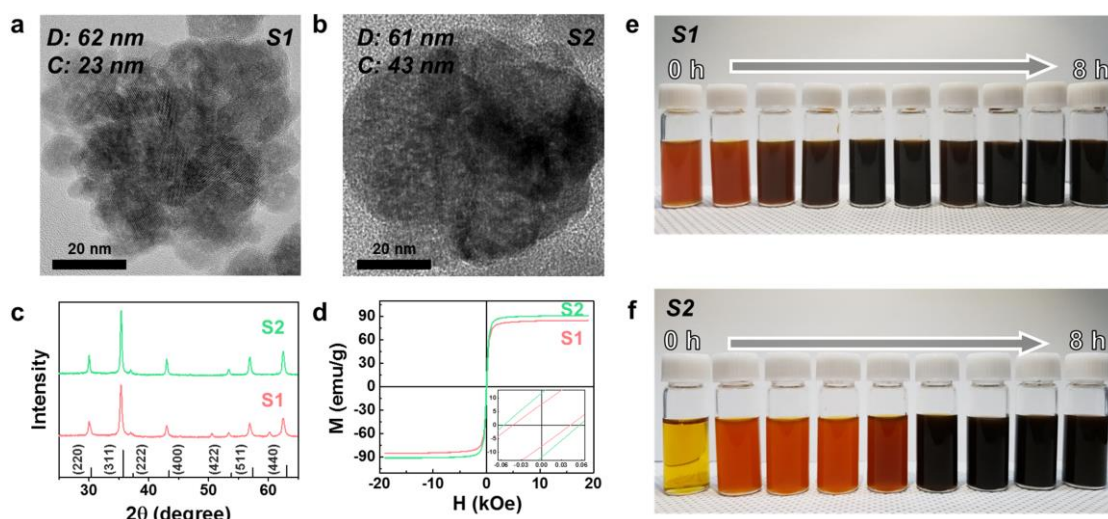

**Supplementary Figure 1. Characterization of samples used for monitoring the formation of Fe<sub>3</sub>O<sub>4</sub> mesocrystals.** **a,b**, TEM images of (a) S1 and (b) S2. The diameter ( $D$ ) and crystallite size ( $C$ ) are marked on the images. **c**, XRD patterns. Magnetite can be indexed using ICDD no. 01-086-1344 (vertical line). **d**, Hysteresis curves of S1 and S2 (inset: high-magnification view of the region near  $H = 0$  Oe). **e,f**, Photographs of solutions at different reflux times (0–8 h); (e) S1 and (f) S2. We prepared 2 mL of each solution immediately after the experiment without a washing procedure.

As shown in the TEM images in Supplementary Figs. 1a and b, the Fe<sub>3</sub>O<sub>4</sub> mesocrystals in S1 are composed of smaller primary crystallites than those in S2. The XRD patterns represent the magnetite phase of the inverse spinel structure with crystallite sizes of 23 and 43 nm for S1 and S2, respectively. The S2 sample, with relatively large crystallites, exhibits higher  $M_s$  and  $H_c$  values than those of the S1 sample. Supplementary Figs. 1e and f show photographs of samples refluxed for 0 to 8 h, with the color gradually changing from orange to black. The color of iron oxides is a clue for distinguishing iron oxide phases; here, it indicates that the black magnetite phase is gradually formed. The reacting solution in Supplementary Fig. 1f (S2) turns black more slowly than that in Supplementary Fig. 1e (S1).

SI 2. Crystallite size analysis using the Williamson-Hall plot

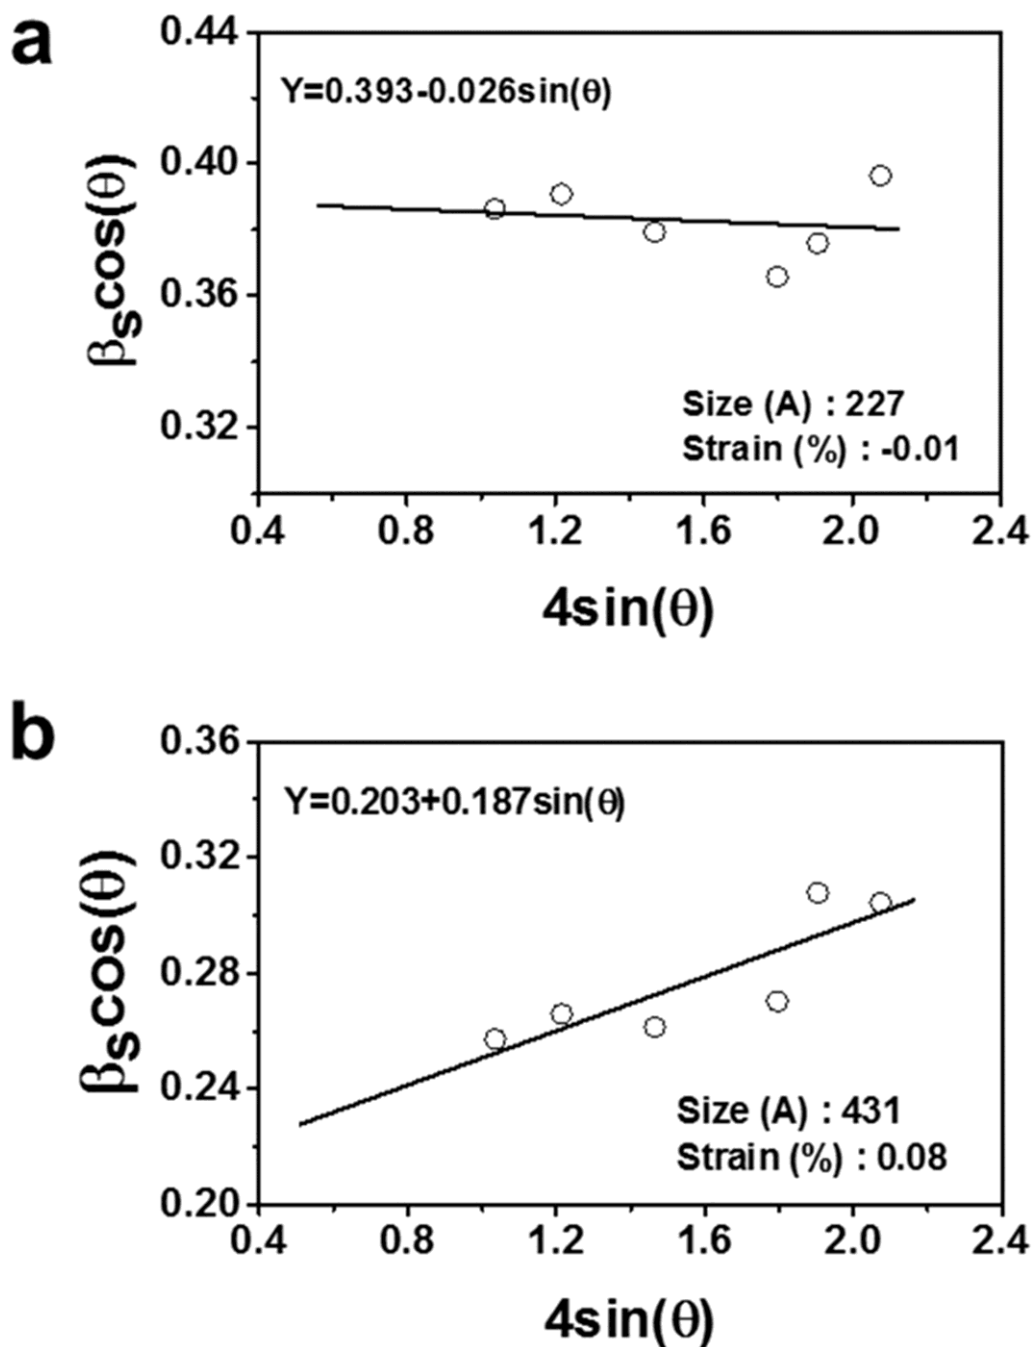

Supplementary Figure 2. Williamson-Hall analysis of the  $\text{Fe}_3\text{O}_4$  mesocrystals in S1 and S2. From the fitting, the strain is extracted from the slope, and the crystallite size is extracted from the y-intercept of the linear fit.

### SI 3. Crystallization process of Fe<sub>3</sub>O<sub>4</sub> mesocrystals in S1

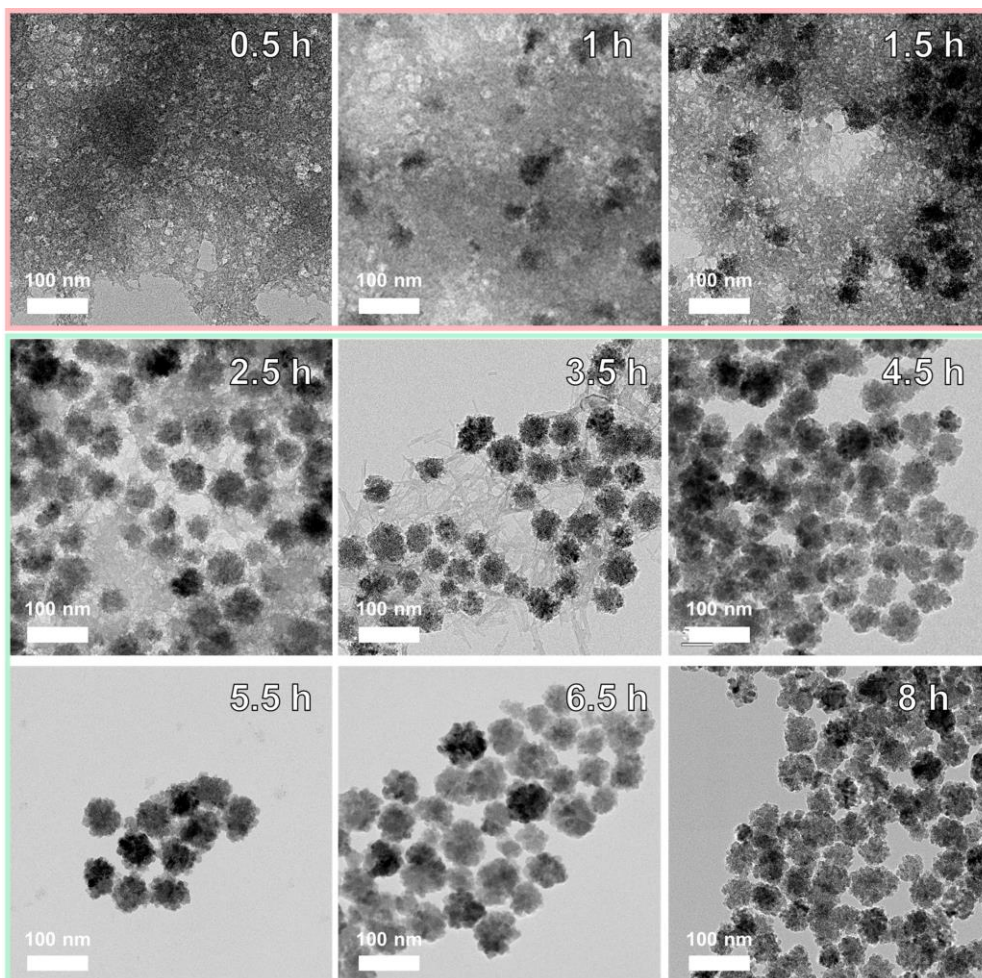

**Supplementary Figure 3. TEM images of S1 at different reflux times (0.5–8 h).**

Supplementary Fig. 3 shows the formation of Fe<sub>3</sub>O<sub>4</sub> mesocrystals over a reflux period of 8 h at 200 °C. The TEM images are distinguishable via two timelines in which Fe<sub>3</sub>O<sub>4</sub> phases are formed from different intermediates. The Fe<sub>3</sub>O<sub>4</sub> mesocrystals emerge in the nanocrystalline iron (oxyhydr)oxide phase after 1 h and grow gradually up until 2.5 h. After 2.5 h, the nanocrystalline intermediate phase disappears, and the tubular amorphous iron (oxyhydr)oxide phase appears in contact with the Fe<sub>3</sub>O<sub>4</sub> mesocrystals. Next, the tubular amorphous iron (oxyhydr)oxide phase disappears, and only Fe<sub>3</sub>O<sub>4</sub> mesocrystals are observed until the reflux period ends. No iron oxide phases other than Fe<sub>3</sub>O<sub>4</sub> are observed, which confirms that Fe<sub>3</sub>O<sub>4</sub> mesocrystals grow as the intermediates are consumed.

#### SI 4. Crystallization process of Fe<sub>3</sub>O<sub>4</sub> mesocrystals in S2

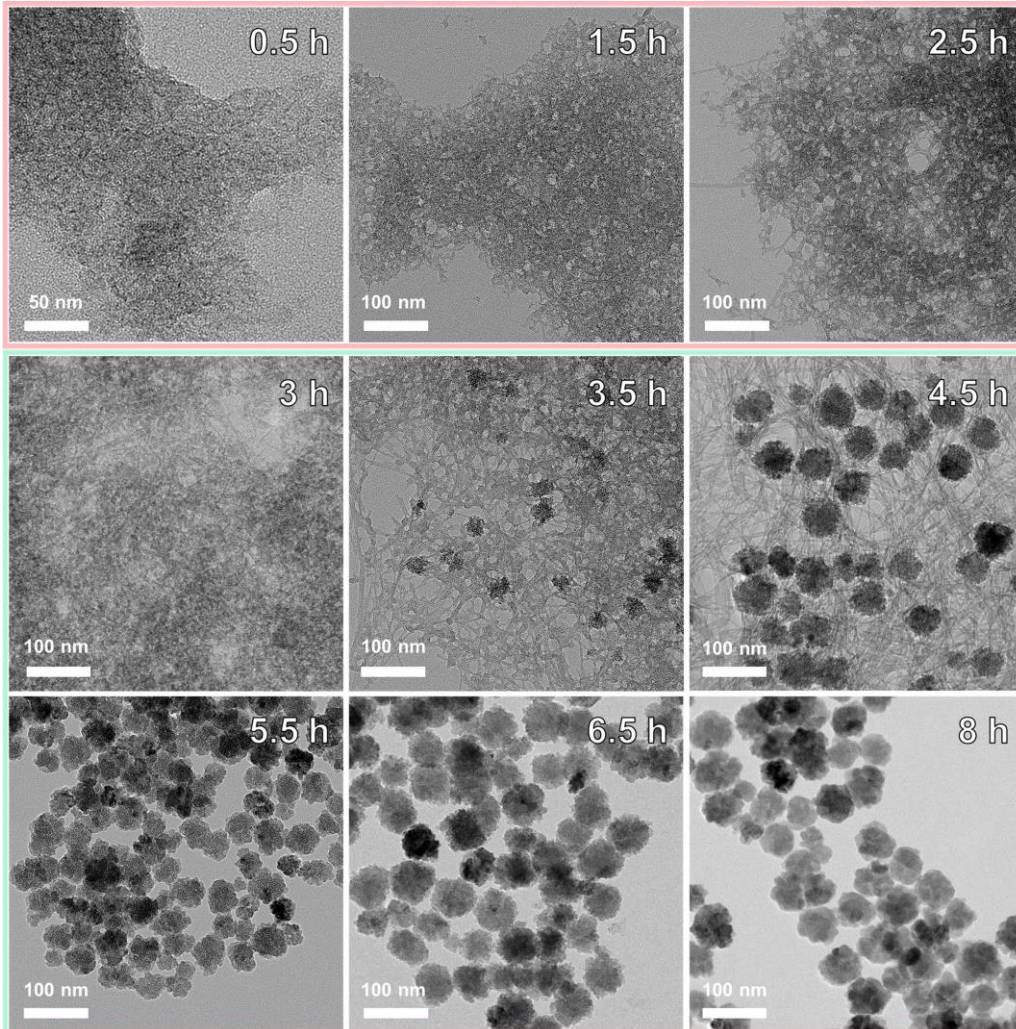

**Supplementary Figure 4. TEM images of S2 at different reflux times (0.5–8 h).**

As shown in the TEM images in Supplementary Fig. 4, the reaction rate of S2 is much slower than that of S1. The Fe<sub>3</sub>O<sub>4</sub> phase appears mainly after 3 h. Fe<sub>3</sub>O<sub>4</sub> primary crystallites rarely appear before 3 h of refluxing. For the S1 sample, the primary Fe<sub>3</sub>O<sub>4</sub> crystallites are frequently generated directly from nanocrystalline lepidocrocite, while it is difficult to observe the formation of the Fe<sub>3</sub>O<sub>4</sub> phase directly from nanocrystalline lepidocrocite in the S2 sample. Most of the growth of Fe<sub>3</sub>O<sub>4</sub> mesocrystals in S2 commences after 3 h via Process 2, with the Fe<sub>3</sub>O<sub>4</sub> crystals forming by consuming tubular goethite.

## SI 5. Microstructural analysis of lepidocrocite intermediate

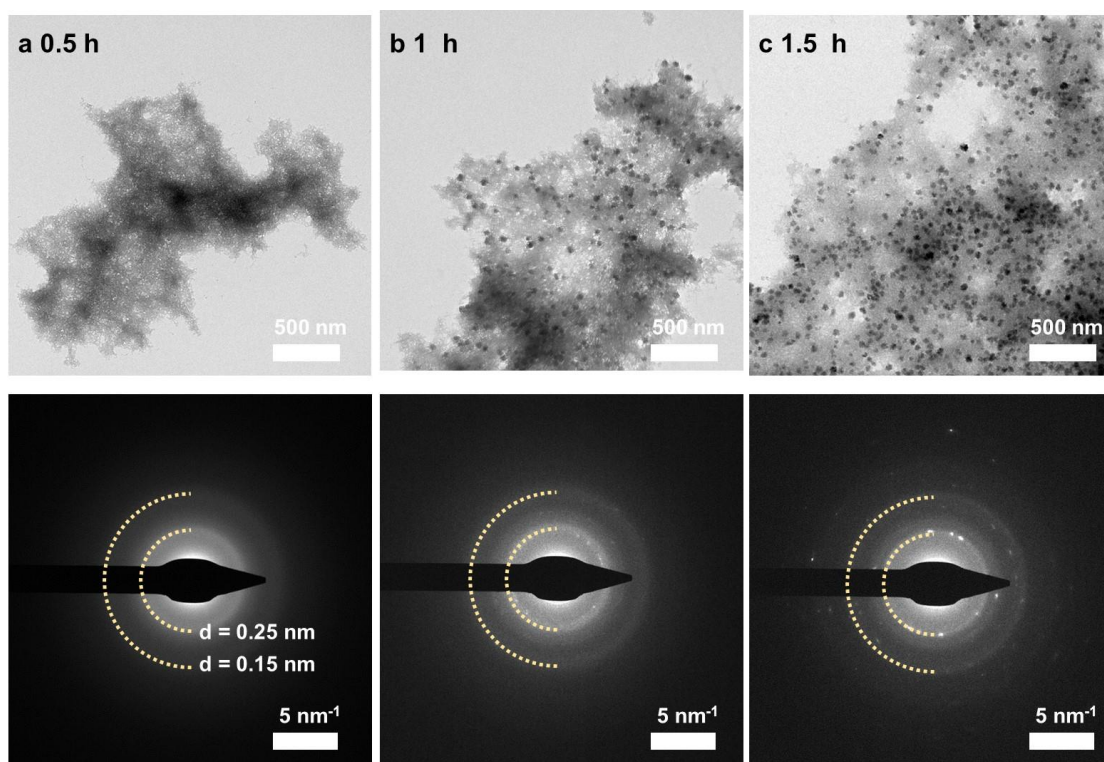

**Supplementary Figure 5. Figure R3. Formation of Fe<sub>3</sub>O<sub>4</sub> mesocrystal from lepidocrocite.** a–c, TEM and SAED pattern of S1 with different refluxing time of 0.5 h (a), 1 h (b) and 1.5 h (c).

## SI 6. Microstructural analysis of Pathway 2 and the coarsening process

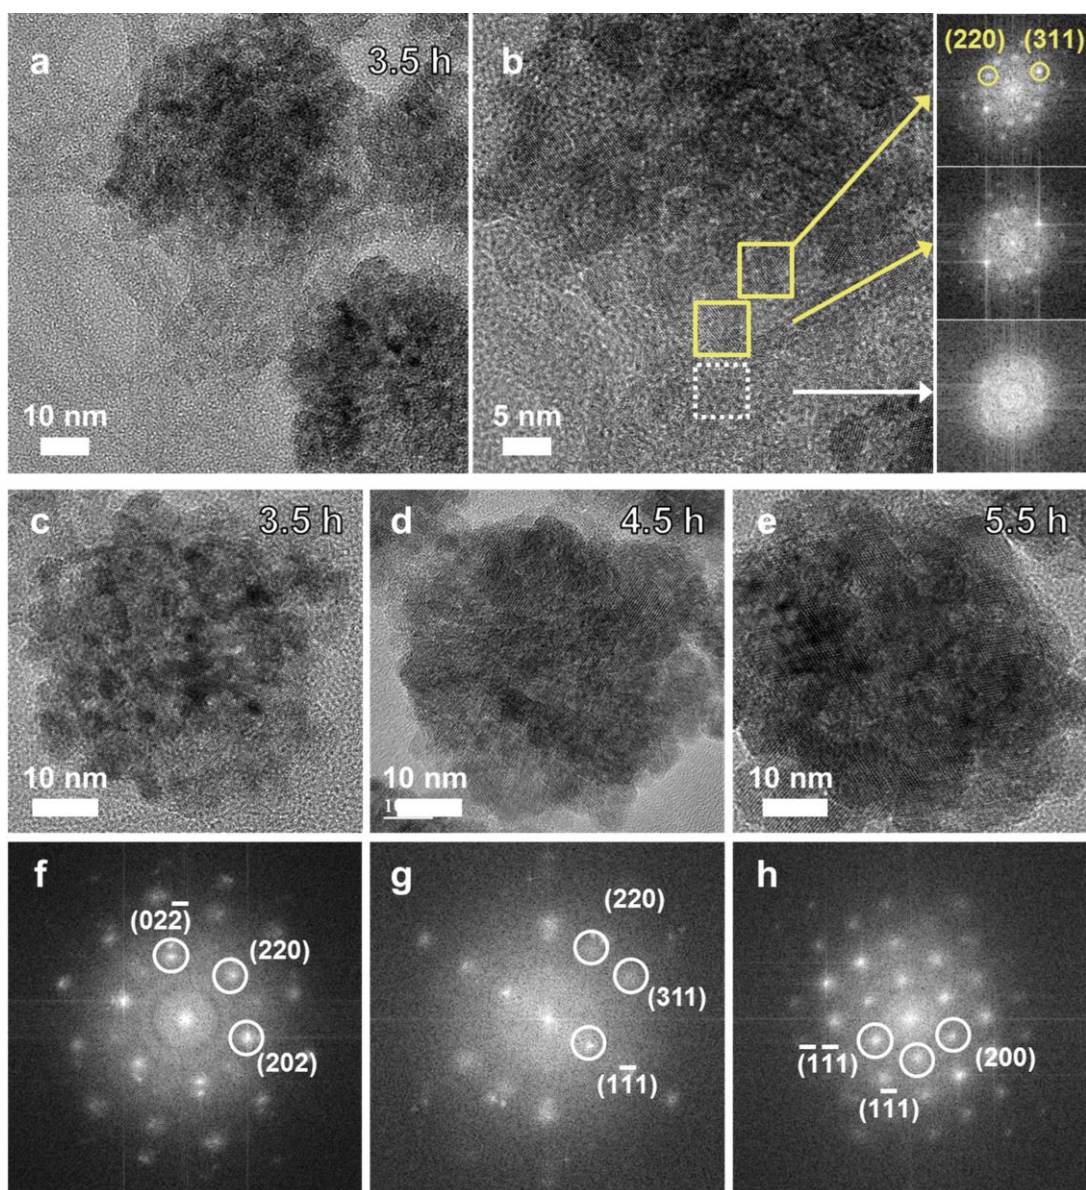

**Supplementary Figure 6. TEM analysis of S1 after refluxing for 3.5 h.** **a,b,** Microstructural analysis of Pathway 2 of S1. (a) Bright-field TEM, (b) HRTEM, and FFT images (right) are shown. Rectangles on the HRTEM image indicate regions from which FFT patterns were obtained. **c-h,** Primary crystallite coarsening and crystallite formation (S1). TEM and FFT images of S1 after reflux times of (c,f) 3.5 h, (d,g) 4.5 h, and (e,h) 5.5 h.

Supplementary Figs. 5a and b show the formation of  $\text{Fe}_3\text{O}_4$  crystals in S1 via Pathway 2. After 2.5 h of refluxing, the nanocrystalline lepidocrocite intermediate gradually disappears, and after 3.5 h, the main intermediate that appears is tubular goethite. This

result indicates that primary  $\text{Fe}_3\text{O}_4$  crystals are formed in the nanocrystalline iron (oxyhydr)oxide matrix, but another amorphous iron (oxyhydr)oxide phase can form concurrently. As shown by the HRTEM and FFT images in Supplementary Fig. 5b, the  $\text{Fe}_3\text{O}_4$  crystal emerging from the tubular amorphous iron (oxyhydr)oxide is aligned with the adjacent  $\text{Fe}_3\text{O}_4$  mesocrystal. However, we do not observe  $\text{Fe}_3\text{O}_4$  crystals in the tubular region away from the  $\text{Fe}_3\text{O}_4$  mesocrystal. The  $\text{Fe}_3\text{O}_4$  crystals grow at the boundary between the tubular intermediate and preexisting  $\text{Fe}_3\text{O}_4$  mesocrystals.



## SI 7. Characteristics of goethite

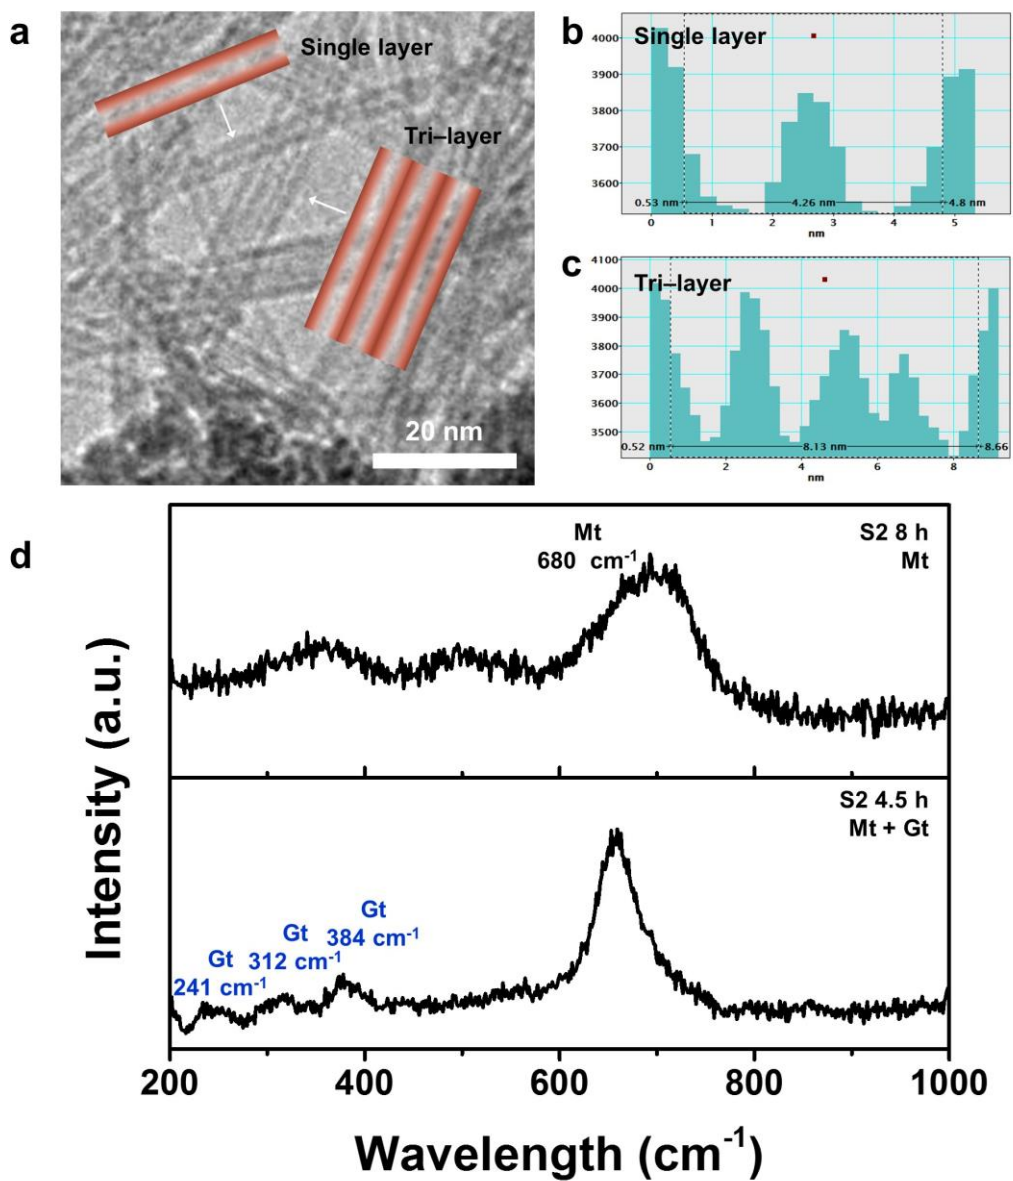

**Supplementary Figure 7. Characteristics of tubular goethite intermediate.** **a**, TEM image of tubular goethite intermediate. **b,c**, Line profile of single- and tri-layered goethite intermediate. **d**, Raman spectra of the S2 with different refluxing time of 4.5 and 8h. Goethite (Gt) :  $\alpha\text{-FeO(OH)}$ , Magnetite (Mt):  $\text{Fe}_3\text{O}_4$ .

## SI 8. JMAK model and schematic illustration of the entire formation process

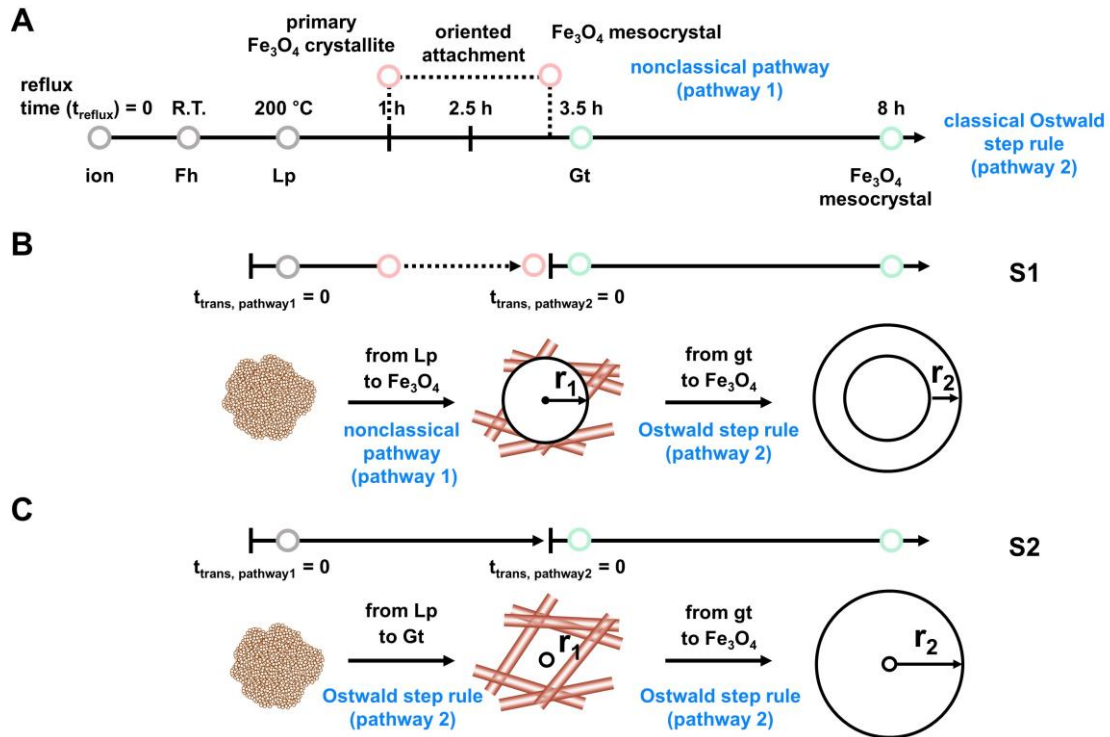

**Supplementary Figure 8. Schematic illustration of the JMAK model.** a, Timeline of the entire reaction. b,c, Timeline of the JMAK model of (b) S1, and (c) S2. We illustrate  $\text{Fe}_3\text{O}_4$  mesocrystal growth via pathways 1 and 2. We define the transformation time ( $t_{\text{trans}}$ ) as the time required for the growth of  $\text{Fe}_3\text{O}_4$  mesocrystals via each pathway ( $t_{\text{trans, pathway1}}$  for Pathway 1 and  $t_{\text{trans, pathway2}}$  for Pathway 2).  $r_1$  and  $r_2$  are the final radii of mesocrystals grown from lepidocrocite and goethite, respectively.

The  $\text{Fe}_3\text{O}_4$  mesocrystals can be formed via different crystallization pathways with distinct mechanisms. They can be formed via stepwise progression from ferrihydrite, lepidocrocite, and goethite (in order of increasing solubility). Crystallization by stepwise phase transformation has been elicited mainly by focusing on the difference in solubility between the intermediates based on the Ostwald step rule. The polymorphs of ferric (oxyhydr)oxide have similar solubility, but the effect of lepidocrocite and goethite on the crystallization pathway of  $\text{Fe}_3\text{O}_4$  varies. Thus, we observe another pathway on which the  $\text{Fe}_3\text{O}_4$  mesocrystals emerge earlier than they do via Pathway 2 owing to direct formation of  $\text{Fe}_3\text{O}_4$  mesocrystals from lepidocrocite, without going through goethite. Both pathways usually operate competitively, but the timing and mechanism of  $\text{Fe}_3\text{O}_4$  crystal formation

are different for each pathway. On Pathway 1,  $\text{Fe}_3\text{O}_4$  mesocrystals are formed early in the reaction. They grow by oriented attachment of the primary  $\text{Fe}_3\text{O}_4$  crystals. When primary crystallites approach each other, the crystallographic orientations of the primary crystallites are rotated, and they share the lattice plane. On Pathway 2,  $\text{Fe}_3\text{O}_4$  mesocrystals are formed late in the reaction. They grow by the interfacial formation of  $\text{Fe}_3\text{O}_4$  crystals at the boundary with tubular goethite. The early stage of Pathway 2 involves transformation from nanocrystalline lepidocrocite to tubular goethite. If growth along pathways 1 and 2 occurs, the  $\text{Fe}_3\text{O}_4$  crystals are grown via Pathway 2 in the later stage, following the crystal facet of preexisting  $\text{Fe}_3\text{O}_4$  mesocrystal synthesized via Pathway 1.

## SI 9. Effect of NaOAC on the formation of $\text{Fe}_3\text{O}_4$ mesocrystals

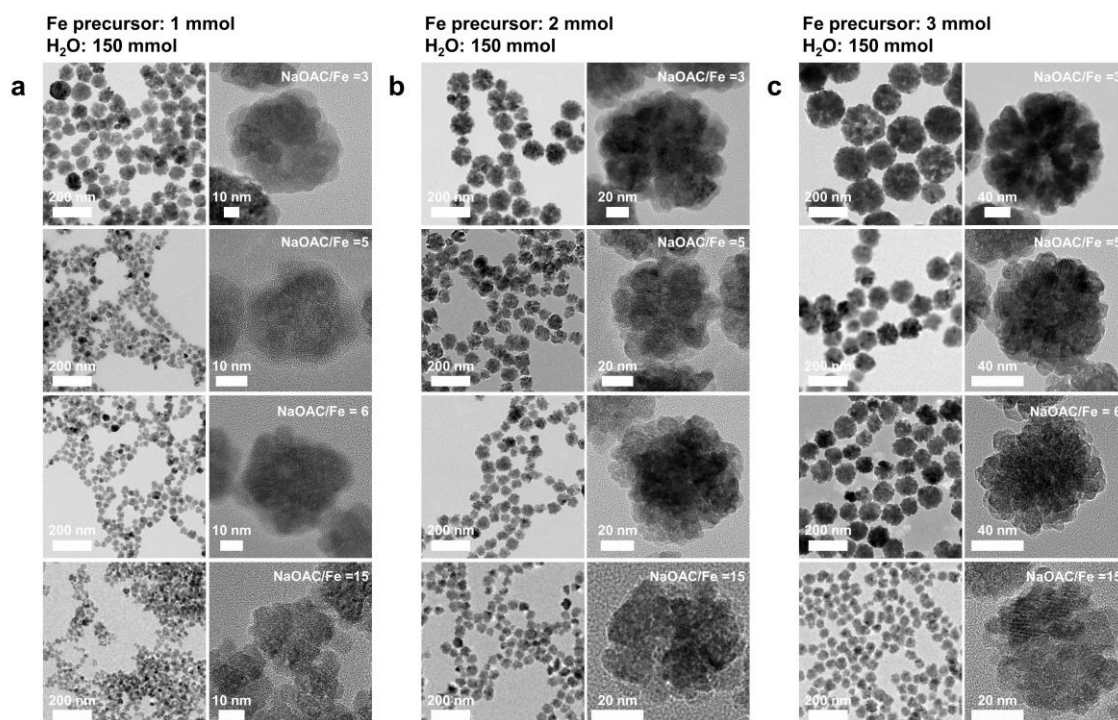

**Supplementary Figure 9.** TEM images of  $\text{Fe}_3\text{O}_4$  mesocrystals synthesized with NaOAC/ $\text{FeCl}_3 \cdot 6\text{H}_2\text{O}$  at 3, 5, 6, and 15. a–c, The  $\text{FeCl}_3 \cdot 6\text{H}_2\text{O}$  content is constant at (a) 1 mmol, (b) 2 mmol, and (c) 3 mmol.

## SI 10. Effect of Fe precursor on the formation of Fe<sub>3</sub>O<sub>4</sub> mesocrystals

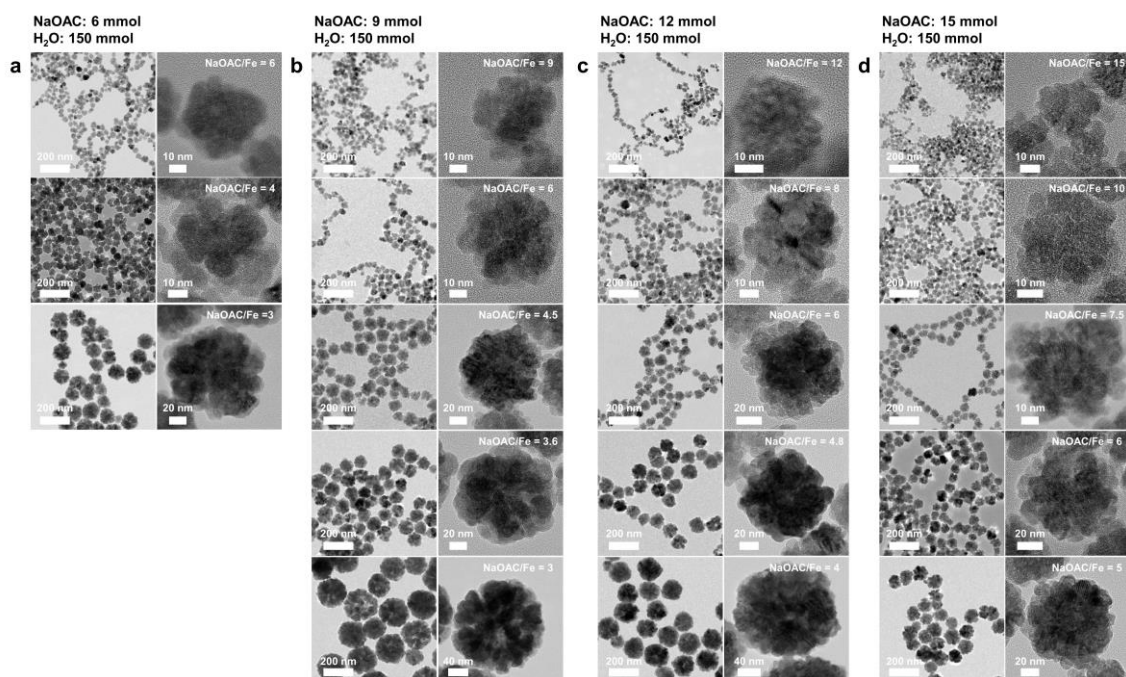

**Supplementary Figure 10. TEM images of Fe<sub>3</sub>O<sub>4</sub> mesocrystals synthesized at various NaOAC/FeCl<sub>3</sub>·6H<sub>2</sub>O ratios. a–d, The NaOAC content is constant at (a) 6 mmol, (b) 9 mmol, (c) 12 mmol, and (d) 15 mmol.**

SI 11. Effect of Fe precursor content on diameter and crystallite size

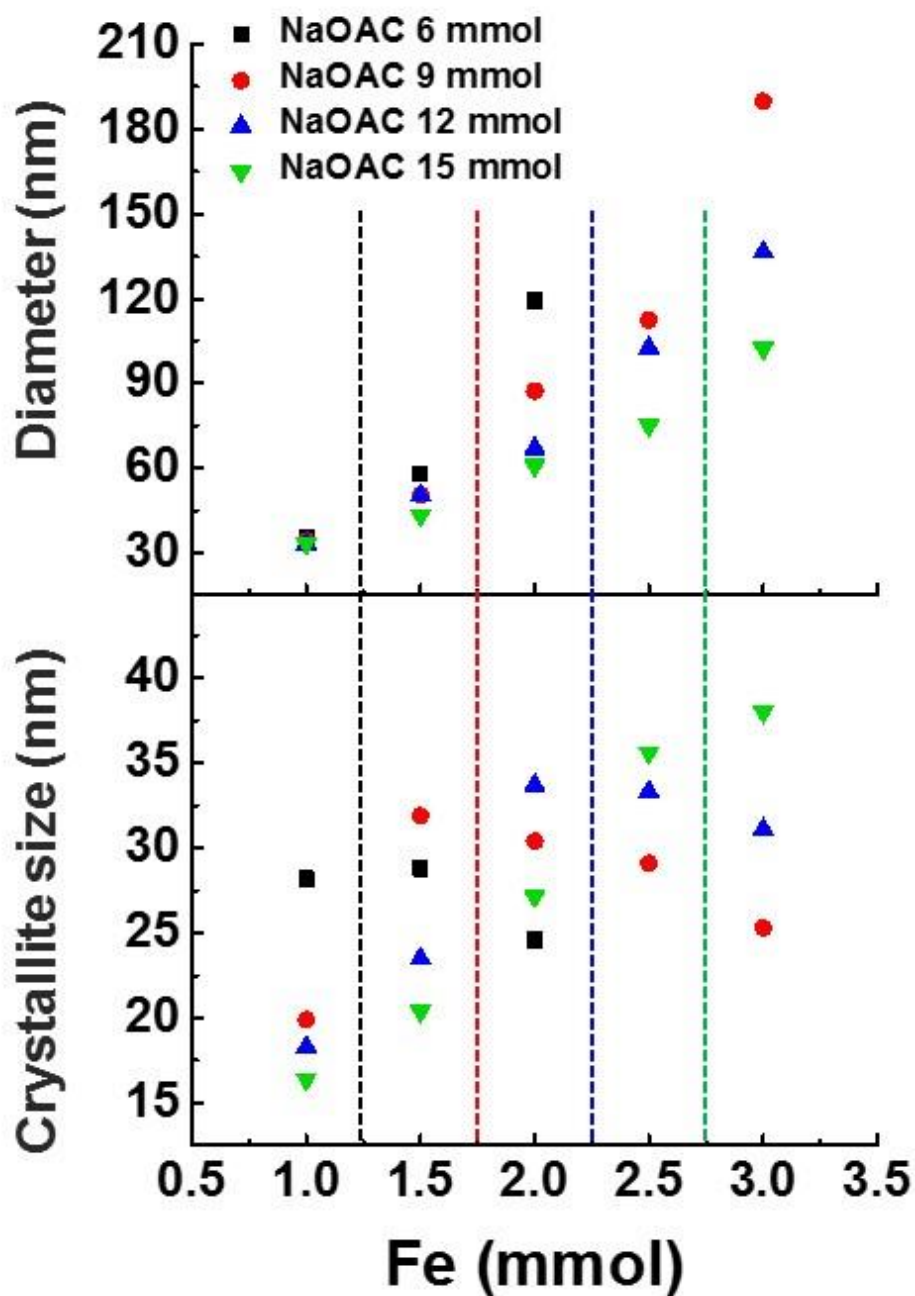

Supplementary Figure 11. Effect of Fe precursor ( $\text{FeCl}_3 \cdot 6\text{H}_2\text{O}$ ) content on the diameter and crystallite size of  $\text{Fe}_3\text{O}_4$  mesocrystals. The dotted lines denote a NaOAC/ $\text{FeCl}_3 \cdot 6\text{H}_2\text{O}$  ratio of 5–6, at which the maximum crystallite size appears, and the diameter begins to increase steeply.

## SI 12. Effect of H<sub>2</sub>O on the formation of Fe<sub>3</sub>O<sub>4</sub> mesocrystals

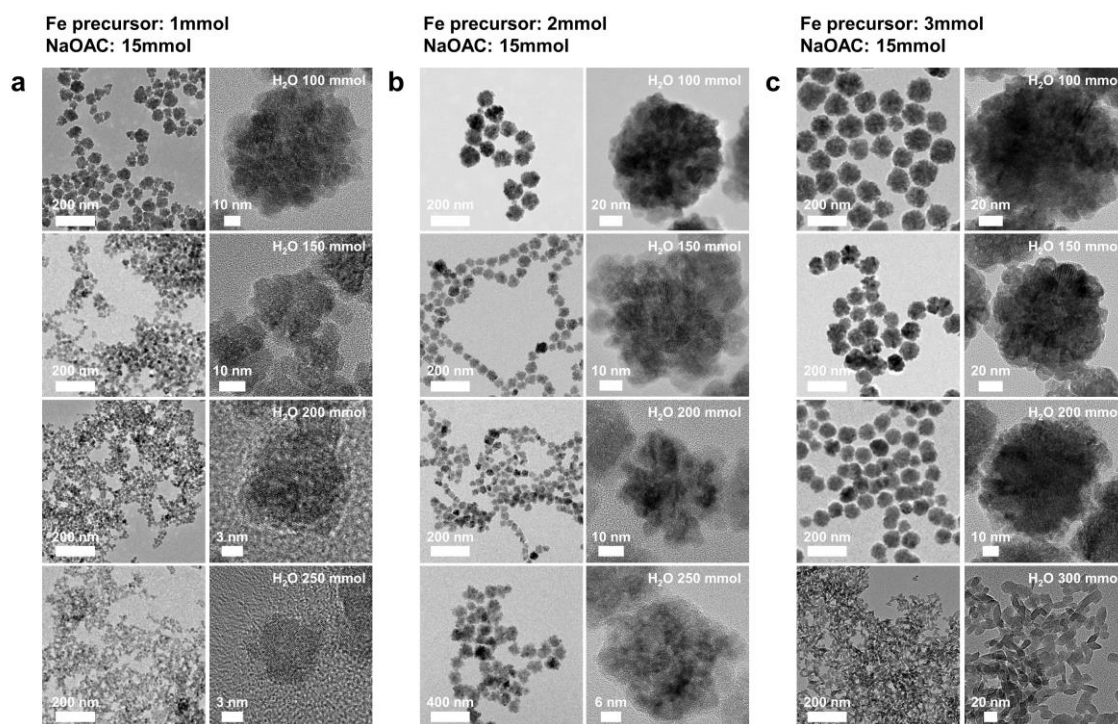

Supplementary Figure 12. TEM images of Fe<sub>3</sub>O<sub>4</sub> mesocrystals synthesized with different H<sub>2</sub>O contents. a-c, The ratio of NaOAC/FeCl<sub>3</sub>·6H<sub>2</sub>O is constant at (a) 15, (b) 7.5, and (c) 5.

### SI 13. Chemical control of crystallization pathway

In Pathway 2 of our experiment, lepidocrocite, goethite, and magnetite were observed in order of increasing solubility, which can be explained using Ostwald's step rule<sup>1</sup>. Because lepidocrocite and goethite have similar solubilities ( $10^{-7}$ – $10^{-8}$  M), Pathway 1, via which  $\text{Fe}_3\text{O}_4$  crystals are formed directly in nanocrystalline lepidocrocite, can occur depending on the chemical composition.

We confirmed variation in the diameter and crystallite size of  $\text{Fe}_3\text{O}_4$  mesocrystals as the NaOAC concentration increased at constant concentrations of  $\text{FeCl}_3 \cdot 6\text{H}_2\text{O}$  and  $\text{H}_2\text{O}$  (150 mmol). Uniform  $\text{Fe}_3\text{O}_4$  mesocrystals are synthesized with each recipe, as shown in the TEM images in Supplementary Fig. 9. As the NaOAC concentration increases, the diameter tends to gradually decrease. The diameter is inversely proportional to the NaOAC/ $\text{FeCl}_3 \cdot 6\text{H}_2\text{O}$  ratio, even if the  $\text{FeCl}_3 \cdot 6\text{H}_2\text{O}$  concentration is fixed. The diameter becomes larger when the concentration of  $\text{FeCl}_3 \cdot 6\text{H}_2\text{O}$  is increased from 1 to 3 mmol at the same NaOAC/Fe ratio; the graph shifts upward on the y-axis. The crystallite size tends to decrease as the NaOAC concentration increases after reaching a maximum value at a NaOAC/ $\text{FeCl}_3 \cdot 6\text{H}_2\text{O}$  ratio of 5–6.

We confirmed that the NaOAC/ $\text{FeCl}_3 \cdot 6\text{H}_2\text{O}$  ratio can affect the diameter and crystallite size of the  $\text{Fe}_3\text{O}_4$  mesocrystals even when the Fe precursor content is controlled while the NaOAC and  $\text{H}_2\text{O}$  contents are constant (for TEM images, see Supplementary Fig. 10). To analyze the effects of the Fe precursor, we increased the  $\text{FeCl}_3 \cdot 6\text{H}_2\text{O}$  content from 1 to 3 mmol in 0.5 mmol increments while keeping the NaOAC and  $\text{H}_2\text{O}$  contents (150 mmol) constant. As the Fe concentration increases, the diameter of the  $\text{Fe}_3\text{O}_4$  mesocrystals increases in inverse proportion to the NaOAC/ $\text{FeCl}_3 \cdot 6\text{H}_2\text{O}$  ratio. When the NaOAC content increases from 6 to 15 mmol, the diameter decreases more gradually with variation in the NaOAC/ $\text{FeCl}_3 \cdot 6\text{H}_2\text{O}$  ratio. Similar to the changes it shows when the NaOAC concentration is varied, the crystallite size exhibits a maximum value at NaOAC/ $\text{FeCl}_3 \cdot 6\text{H}_2\text{O}$  = 5–6. When the concentration of the Fe precursor is increased such that the NaOAC/ $\text{FeCl}_3 \cdot 6\text{H}_2\text{O}$  ratio becomes smaller than 5–6, the crystallite size tends to decrease, and the diameter tends to increase steeply. These phenomena are presented more clearly in Supplementary Fig. 11, where the x-axis represents the Fe content.

To analyze the effect of  $\text{H}_2\text{O}$ , its amount is varied from 100 to 300 mmol while the



$\text{FeCl}_3 \cdot 6\text{H}_2\text{O}$  and NaOAC contents are kept constant (for TEM images, see Supplementary Fig. 12). The diameter decreases as the amount of  $\text{H}_2\text{O}$  increases. As we add more Fe precursors (from 1 to 3 mmol), the diameter increases. As the amount of  $\text{H}_2\text{O}$  increases, the crystallite size exhibits a maximum value at a certain  $\text{H}_2\text{O}$  content and then tends to decrease. The effect of the  $\text{H}_2\text{O}$  content on the crystallite size is similar to that of the NaOAC content. The reason is that the concentration of  $\text{OH}^-$  ions is determined by the equilibrium reaction between NaOAC and  $\text{H}_2\text{O}$ . There is a limited range of  $\text{H}_2\text{O}$  content in which  $\text{Fe}_3\text{O}_4$  mesocrystals can be synthesized. As the  $\text{FeCl}_3 \cdot 6\text{H}_2\text{O}$  content increases from 1 to 3 mmol, the range of  $\text{H}_2\text{O}$  content in which  $\text{Fe}_3\text{O}_4$  can form becomes narrower. For example, if more than 200 mmol of  $\text{H}_2\text{O}$  is added and the  $\text{FeCl}_3 \cdot 6\text{H}_2\text{O}$  content is kept constant at 3 mmol, goethite ( $\alpha\text{-FeOOH}$ ) and hematite ( $\alpha\text{-Fe}_2\text{O}_3$ ) would be synthesized rather than magnetite.

We have shown that two pathways are competitive in the formation of  $\text{Fe}_3\text{O}_4$  mesocrystals and that the crystallite size differs depending on which pathway is dominant. It can be inferred that the increase in crystallite size when the NaOAC/ $\text{FeCl}_3 \cdot 6\text{H}_2\text{O}$  ratio increases is related to the formation pathway.

The crystallite size decreases when the NaOAC content decreases or the  $\text{FeCl}_3 \cdot 6\text{H}_2\text{O}$  content increases for NaOAC/ $\text{FeCl}_3 \cdot 6\text{H}_2\text{O} < 5$ , indicating that Pathway 1 gradually accounts for the entire reaction. The reason could be the effect of excess  $\text{Fe}^{3+}$  cations, which could be reduced to  $\text{Fe}^{2+}$  by the subsequent reaction with ethylene glycol. The addition of  $\text{Fe}^{2+}$  to preexisting ferrihydrite can determine the subsequent phase<sup>2-4</sup>. Goethite and lepidocrocite appear mainly at low concentrations of  $\text{Fe}^{2+}$ , and magnetite can be synthesized directly at high concentrations of  $\text{Fe}^{2+}$ . As the  $\text{Fe}^{2+}$  concentration increases, it is adsorbed onto the surface of the iron (oxyhydr)oxide phases, and it transfers electrons to the bulk iron (oxyhydr)oxide, thus promoting the growth of magnetite. Here, increasing the supply of NaOAC causes a gradual decrease in the ratio of excess  $\text{Fe}^{3+}$ , and consequently, the proportion of Pathway 2 on which magnetite is formed by lepidocrocite and goethite gradually increases. Conversely, the supply of the Fe precursor increases the excess  $\text{Fe}^{3+}$ , and thus Pathway 1 dominates the synthesis of  $\text{Fe}_3\text{O}_4$  mesocrystals and reduces the crystallite size. The crystallite size tends to decrease for NaOAC/Fe  $> 5$ , owing to the effect of the reduced diameter.

It was confirmed that both the crystallite size and diameter tend to behave differently

above and below  $\text{NaOAC/FeCl}_3 \cdot 6\text{H}_2\text{O} = 5-6$ . The diameter increases slowly at  $\text{NaOAC/FeCl}_3 \cdot 6\text{H}_2\text{O} > 5-6$  and abruptly at  $\text{NaOAC/FeCl}_3 \cdot 6\text{H}_2\text{O} < 5-6$ . Thus, the diameter can also be affected by the formation pathway. In the classical nucleation and growth model, rapid nucleus formation produces larger numbers of small mesocrystals<sup>5</sup>. For  $\text{Fe}_3\text{O}_4$  mesocrystal synthesis, the concentration of  $\text{OH}^-$  increases, and hydrolysis and condensation of  $\text{FeCl}_3 \cdot 6\text{H}_2\text{O}$  are accelerated, resulting in small  $\text{Fe}_3\text{O}_4$  mesocrystals.

However, our study suggests that the results depend on the formation pathway. As the  $\text{NaOAC/FeCl}_3 \cdot 6\text{H}_2\text{O}$  ratio becomes smaller than 5–6, Pathway 1 dominates, and  $\text{Fe}_3\text{O}_4$  mesocrystals grow by oriented attachment of primary  $\text{Fe}_3\text{O}_4$  crystallites. If nucleation of the primary  $\text{Fe}_3\text{O}_4$  crystallites increases, the chance of contact increases, and the mesocrystals grow larger. For example, as the amount of Fe precursor increases, the amount of excess  $\text{Fe}^{3+}$  increases, and thus the primary  $\text{Fe}_3\text{O}_4$  crystallites are nucleated more rapidly, and the mesocrystals quickly grow larger. This differs from the classical pathway in which the diameter decreases as more nuclei form. On the other hand, at  $\text{NaOAC/FeCl}_3 \cdot 6\text{H}_2\text{O} > 5-6$ , Pathway 2, on which  $\text{Fe}_3\text{O}_4$  crystals nucleate and grow at the interface of intermediate and preformed  $\text{Fe}_3\text{O}_4$  mesocrystals, affects the formation of  $\text{Fe}_3\text{O}_4$  mesocrystals. Therefore, in this  $\text{NaOAC/FeCl}_3 \cdot 6\text{H}_2\text{O}$  range, the size of the  $\text{Fe}_3\text{O}_4$  mesocrystals can be increased if larger amounts of the intermediate phases are formed by increasing the Fe precursor. Here, this can be explained by a classical model in which mesocrystals grow larger as the number of preformed nuclei decreases.

Furthermore, we found that the water content has an effect similar to that of the NaOAC content, but it has a greater impact on the predominance of Pathway 2. Dehydration occurs during magnetite formation from ferrihydrite to ferric (oxyhydr)oxides. Increases in the  $\text{H}_2\text{O}$  content can interfere with dehydration, resulting in slower reactions (Pathway 2) and larger crystallites.

**Supplementary Table S1. Parameters for  $H_c$  fitting.** The diameter and crystallite size of mesocrystals are determined using TEM images and XRD patterns.  $H_c$  values are measured using a VSM at RT.

| $C = 10$ nm      |                             |               | $C = 17$ nm      |                             |               | $C = 27$ nm       |                             |               |
|------------------|-----------------------------|---------------|------------------|-----------------------------|---------------|-------------------|-----------------------------|---------------|
| parameters       | $g$<br>$h$                  | 16<br>-1419   | parameters       | $g$<br>$h$                  | 33<br>-4357   | parameters        | $g$<br>$h$                  | 50<br>-5202   |
| diameter<br>(nm) | crystallite<br>size<br>(nm) | $H_c$<br>(Oe) | diameter<br>(nm) | crystallite<br>size<br>(nm) | $H_c$<br>(Oe) | diameter<br>(nm)  | crystallite<br>size<br>(nm) | $H_c$<br>(Oe) |
| 10               | 4                           | 0.1           | 15               | 17                          | 0.05          | 25                | 26                          | 11.9          |
| 15               | 6                           | 0.2           | 34               | 16                          | 11.0          | 42                | 27                          | 25.9          |
| 17               | 9                           | 0.3           | 61               | 18                          | 24.8          | 47                | 26                          | 30.1          |
| 24               | 15                          | 3.0           | 78               | 17                          | 24.9          | 63                | 25                          | 39.2          |
| 30               | 15                          | 8.0           | 108              | 17                          | 30.9          | 87                | 30                          | 49.3          |
| 40               | 14                          | 9.2           |                  |                             |               |                   |                             |               |
| 65               | 13                          | 14.1          |                  |                             |               |                   |                             |               |
| 119              | 17                          | 14.1          |                  |                             |               |                   |                             |               |
| $C = 32$ nm      |                             |               | $C = 40$ nm      |                             |               | Lee et al. (2015) |                             |               |
| parameters       | $g$<br>$h$                  | 60<br>-7229   | parameters       | $g$<br>$h$                  | 71<br>-9192   | parameters        | $g$<br>$h$                  | 55<br>-10,000 |
| diameter<br>(nm) | crystallite<br>size<br>(nm) | $H_c$<br>(Oe) | diameter<br>(nm) | crystallite<br>size<br>(nm) | $H_c$<br>(Oe) | diameter<br>(nm)  | crystallite<br>size<br>(nm) | $H_c$<br>(Oe) |
| 36               | 30                          | 27.5          | 49               | 40                          | 43.6          | 16                | 8                           | 0.25          |
| 51               | 32                          | 39.2          | 63               | 38                          | 56.3          | 32                | 9                           | 0.57          |
| 61               | 32                          | 42.9          | 66               | 42                          | 51.5          | 53                | 12                          | 19.1          |
| 67               | 34                          | 46.1          | 90               | 39                          | 58.1          | 80                | 17                          | 35.1          |
| 83               | 32                          | 51.2          | 102              | 38                          | 63.7          | 99                | 20                          | 41.6          |
| 103              | 33                          | 55.6          |                  |                             |               | 123               | 26                          | 47.7          |

## References

1. Ostwald, W. Studien über die bildung und umwandlung fester körper. *Z. Phys. Chem.* **22**, 289–330 (1897).
2. Ahn, T. Formation pathways of magnetite nanoparticles by coprecipitation method. *J. Phys. Chem. C* **116**, 6069–6076 (2012).
3. Hansel, C. M., Benner, S. G. & Fendorf, S. Competing Fe(II)-induced mineralization pathways of ferrihydrite. *Environ. Sci. Technol.* **39**, 7147 (2005).
4. Vali, H. et al. Formation of tabular single-domain magnetite induced by *Geobacter metallireducens* GS-15. *Proc. Natl. Acad. Sci. U. S. A.* **101**, 16121–16126 (2004).
5. Thanh, N. T. K., Maclean, N. & Mahiddine, S. Mechanisms of nucleation and growth of nanoparticles in solution. *Chem. Rev.* **114**, 7610–7630 (2014).
